# Supplementary material for: Low Dark Current and Performance Enhanced Perovskite Photodetector by Graphene Oxide as an Interfacial Layer
Source: MDPI journal article supplement (doi:10.3390/nano12020190), 2022-01-06
Supplement: s1 [file s1]

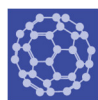

## Supplementary Materials

# Low Dark Current and Performance Enhanced Perovskite Photodetector by Graphene Oxide as an Interfacial Layer

Ali Hassan <sup>1</sup>, Muhammad Azam <sup>2</sup>, Yeong Hwan Ahn <sup>3</sup>, Muhammad Zubair <sup>4</sup>, Yu Cao <sup>1</sup>, and Abbas Ahmad Khan <sup>3,\*</sup>

**Citation:** Hassan, A.; Azam, M.; Ahn, Y.H.; Zubair, M.; Cao, Y.; Khan, A.A. Low Dark Current and Performance Enhanced Perovskite Photodetector by Graphene Oxide as an Interfacial Layer. *Nanomaterials* **2022**, *12*, 190. <https://doi.org/10.3390/nano12020190>

<sup>1</sup> International Science & Technology Cooperation Base for Laser Processing Robots, Wenzhou University, Wenzhou 325035, China; 15alirao@gmail.com (A.H.); yucao@wzu.edu.cn (Y.C.)

<sup>2</sup> Department of Physics, Faculty of Sciences, University of Central Punjab, Lahore 54000, Pakistan; muhammad.azam01@ucp.edu.pk

<sup>3</sup> Department of Physics and Department of Energy Systems Research, Ajou University, Suwon 16499, Korea; ahny@ajou.ac.kr

<sup>4</sup> Department of Physics, Abbottabad University of Science and Technology, Abbottabad 22010, Pakistan; zubairphy@aust.edu.pk

\* Correspondence: abbaskhan@ajou.ac.kr

Academic Editor: Alain Pignolet

Received: 9 December 2021

Accepted: 4 January 2022

Published: 6 January 2022

**Publisher's Note:** MDPI stays neutral with regard to jurisdictional claims in published maps and institutional affiliations.

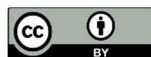

**Copyright:** © 2022 by the authors. Licensee MDPI, Basel, Switzerland. This article is an open access article distributed under the terms and conditions of the Creative Commons Attribution (CC BY) license (<https://creativecommons.org/licenses/by/4.0/>).

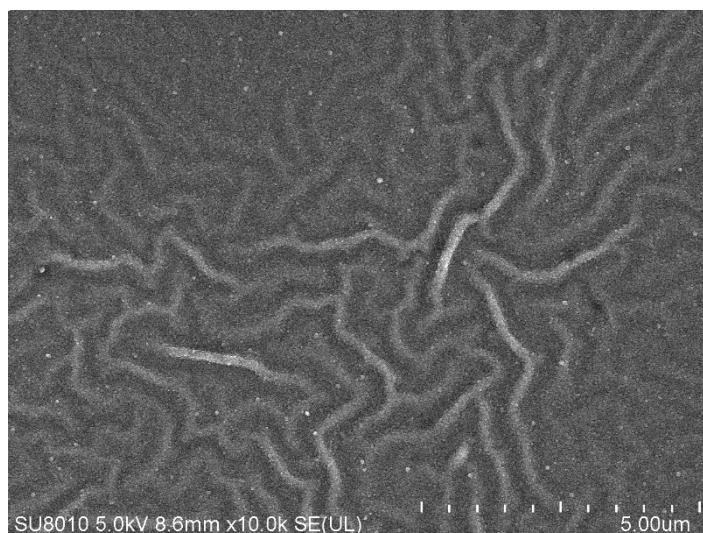

**Figure S1.** SEM image of graphene oxide layer on glass substrate.

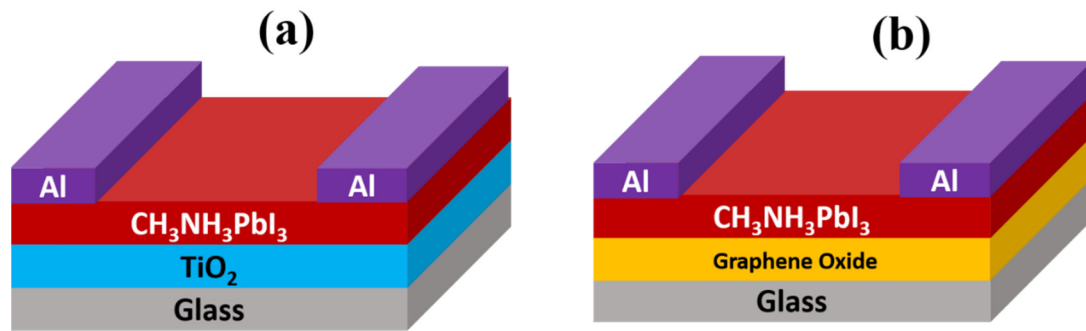

**Figure S2.** Schematic diagram of bilayer photodetector device containing (a) TiO<sub>2</sub>/MAPbI<sub>3</sub> (b) GO/MAPbI<sub>3</sub>.

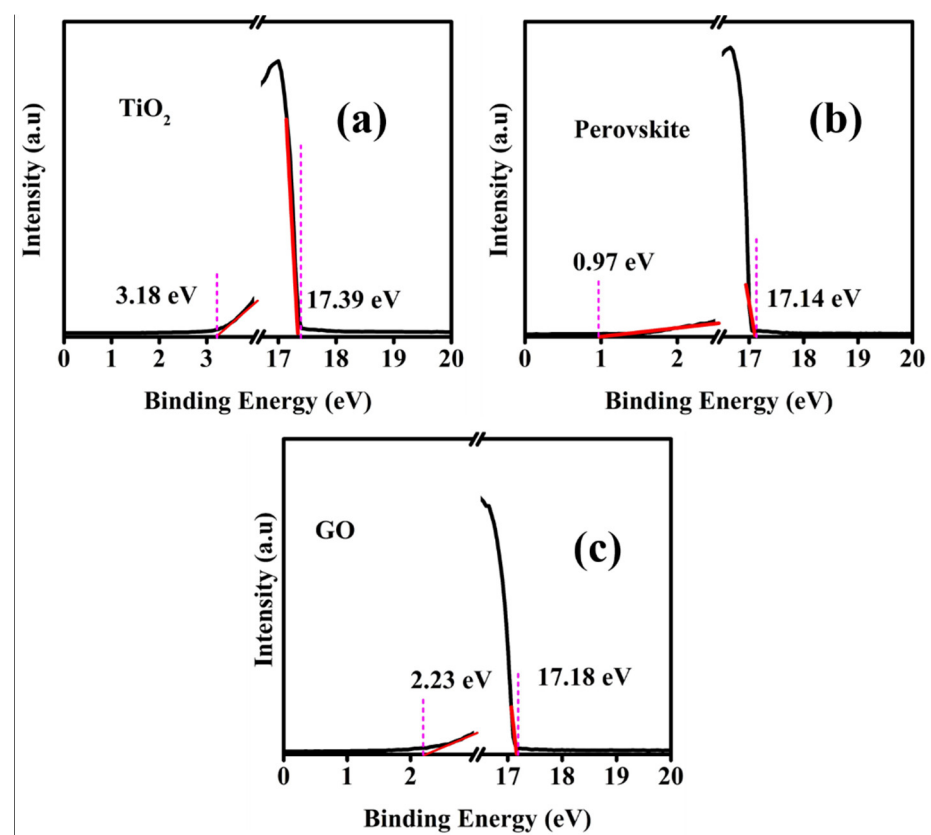

**Figure S3.** Ultraviolet Photoelectron Spectroscopy (UPS) spectra for (a) TiO<sub>2</sub>, (b) Perovskite (MAPbI<sub>3</sub>) and (c) Graphene Oxide layer.

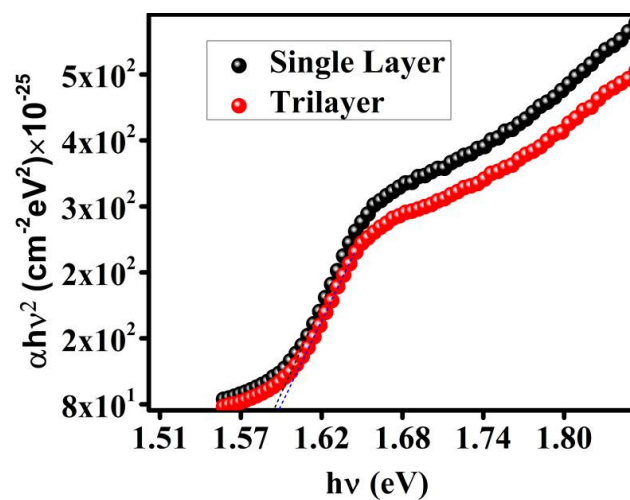

**Figure S4.** Tauc's plot of single layer (without GO) and trilayer (with GO) films derived from the absorbance data.

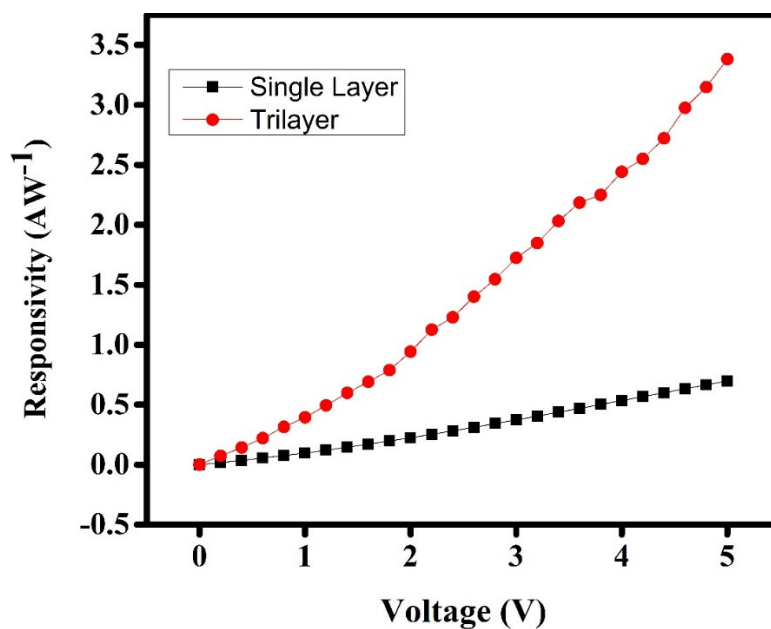

**Figure S5.** Responsivity of single layer (without GO) and trilayer (with GO) devices with increasing voltage. The responsivity increases as the bias voltage increases. The trilayer device exhibit higher responsivity.

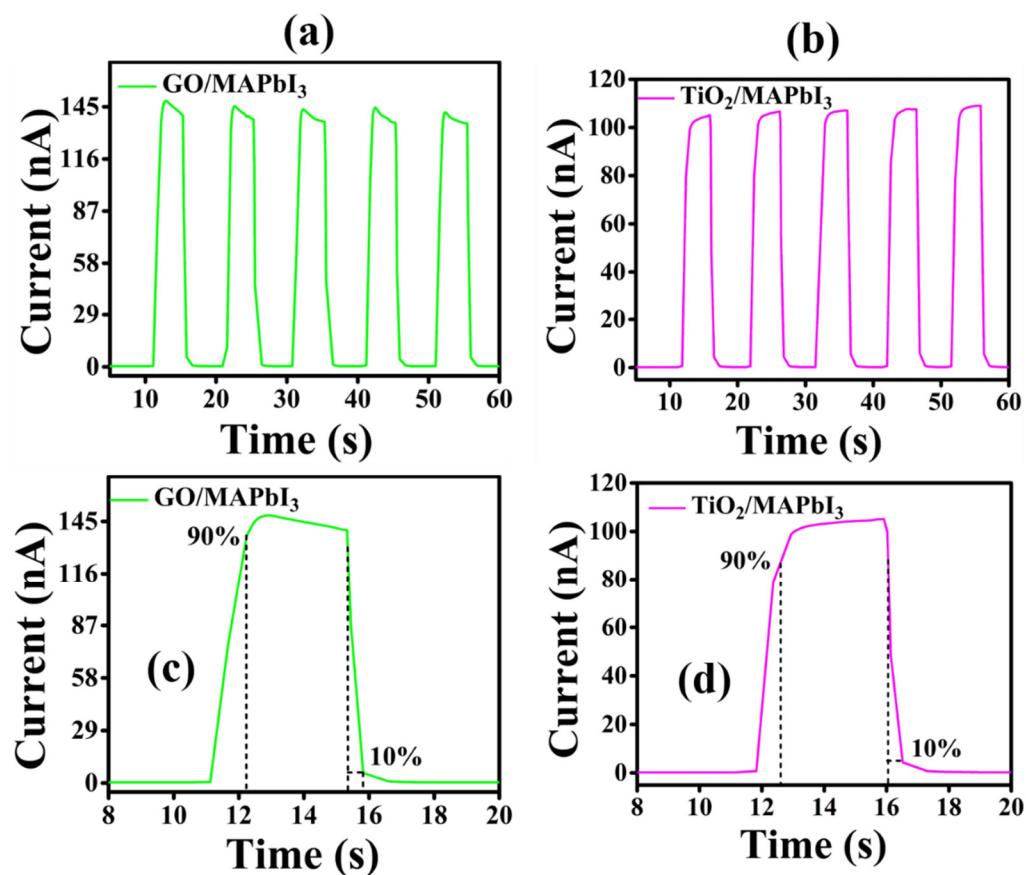

**Figure S6.** (a,b) On/Off switching results of bilayer devices (GO/MAPbI<sub>3</sub> and TiO<sub>2</sub>/MAPbI<sub>3</sub>). Single cycle with rise and decay time of (c) GO/MAPbI<sub>3</sub> (d) TiO<sub>2</sub>/MAPbI<sub>3</sub>.

**Table S1.** Device results of all four devices for detailed comparison.

| Device                                        | Dark Current (A)       | Light Current (A)     | Responsivity (A/W) | On/off ratio | Rise/decay (s) |
|-----------------------------------------------|------------------------|-----------------------|--------------------|--------------|----------------|
| D1 (MAPbI <sub>3</sub> )                      | $9.03 \times 10^{-11}$ | $4.19 \times 10^{-8}$ | 0.69               | 464          | 1.15/0.78      |
| D2 (GO/MAPbI <sub>3</sub> )                   | $4.35 \times 10^{-11}$ | $1.52 \times 10^{-7}$ | 2.54               | 3494         | 0.98/0.43      |
| D3 (TiO <sub>2</sub> /MAPbI <sub>3</sub> )    | $3.39 \times 10^{-11}$ | $1.11 \times 10^{-7}$ | 1.86               | 3274         | 0.95/0.42      |
| D4 (TiO <sub>2</sub> /GO/MAPbI <sub>3</sub> ) | $1.55 \times 10^{-11}$ | $2.02 \times 10^{-7}$ | 3.38               | 13,031       | 0.45/0.33      |

**Table S2.** Stability parameters of Single and Trilayer device after 30 days in ambient environment.

| Device                                        | Dark Current (A)       | Light Current (A)     | Responsivity (A/W) | On/off ratio |
|-----------------------------------------------|------------------------|-----------------------|--------------------|--------------|
| D1 (MAPbI <sub>3</sub> )                      | $3.99 \times 10^{-10}$ | $4.18 \times 10^{-8}$ | 0.65               | 105          |
| D4 (TiO <sub>2</sub> /GO/MAPbI <sub>3</sub> ) | $2.84 \times 10^{-11}$ | $1.46 \times 10^{-7}$ | 2.43               | 5140         |

**Table S3.** Comparison of Single, Bilayer, and Trilayer photodetector device parameters previously reported with current study.

| Structure                 | Wavelength (nm)/Illumination Power | Dark Current (A)      | On/Off ratio | R (A/W) | Rise/Decay Time | Active Area (μm <sup>2</sup> ) | Ref. |
|---------------------------|------------------------------------|-----------------------|--------------|---------|-----------------|--------------------------------|------|
| MAPbI <sub>3</sub>        | 550/2.7 × 10 <sup>-3</sup> mW      | $1.67 \times 10^{-9}$ | 4.89         | 0.027   | 1.2/0.2 s       | 10,000 × 15,000                | [1]  |
| MAPbBr <sub>3</sub>       | 532/100 mW                         | $1.0 \times 10^{-7}$  | -            | 0.1     | 70/150 μs       | -                              | [2]  |
| PCBM/MAPbI <sub>3</sub>   | 365/2 mW                           | 10 <sup>-7</sup>      | 3000         | 0.18    | 123/180 ms      | -                              | [3]  |
| PDPP3T/MAPbI <sub>3</sub> | 365/0.5                            | $84.5 \times 10^{-9}$ | 6            | 0.0107  | 50/100 ms       | 330,000                        | [4]  |
|                           | 650/0.5                            |                       | 15           | 0.0255  | 40/140 ms       |                                |      |
|                           | 937/0.5                            |                       | 33           | 0.0055  | 30/150 ms       |                                |      |

|                                                                 |                          |                             |                      |                   |              |                    |      |
|-----------------------------------------------------------------|--------------------------|-----------------------------|----------------------|-------------------|--------------|--------------------|------|
| Single Crystal MAPbI <sub>3</sub>                               | 780/0.32                 |                             | <4000                | 1.6               |              |                    |      |
|                                                                 | 780/0.05                 | $4 \times 10^{-8}$          | <1000                | 2.531             | -            | 85,000             | [5]  |
|                                                                 | 405/0.05                 |                             | <500                 | 0.181             |              |                    |      |
| Nanocrystals CsPbI <sub>3</sub>                                 | 405/1.38                 | $\sim 1 \times 10^{-9}$     | 100,000              | 0.31              | 24/29 ms     | $3 \times 7800$    | [6]  |
| MAPbI <sub>3</sub> /graphene                                    | 520/2                    | $\sim 0.5 \times 10^{-3}$   | <1.5                 | 180               | 0.087/0.54 s | $50 \times 1000$   | [7]  |
| CH <sub>3</sub> NH <sub>3</sub> I <sub>3</sub> /graphene/Au NPs | 532/0.014                | $\sim 8.8 \times 10^{-4}$   | <2                   | $2.1 \times 10^3$ | 1.5/10 s     | $40 \times 20,000$ | [8]  |
| Graphene/Psk/Graphene                                           | 452/2.1                  | $2.5 \times 10^{-9}$        | $2.6 \times 10^3$    | 0.022             | -            | -                  | [9]  |
| MAPbBr <sub>2</sub> /Graphene                                   | 405/1.052 nW             | $5.5 \times 10^{-3}$        | $\sim 1.2$           | $6 \times 10^5$   | 0.12/0.75 s  | -                  | [10] |
| NWs MAPbI <sub>3</sub> /graphene                                | $633/6.5 \times 10^{-5}$ | $\sim 2.7 \times 10^{-7}$   | $\sim 1.2$           | $2.6 \times 10^6$ | 55/75 s      | $10 \times 10$     | [11] |
| MAPbI <sub>3</sub> /MoS <sub>2</sub>                            | 520/6                    |                             | $\sim 10,000$        | $\sim 2120$       |              |                    |      |
|                                                                 | 655/6                    | $\sim 1.5 \times 10^{-5}$   | $\sim 6000$          | $\sim 824$        | 6.17/4.5 s   | $5 \times 5$       | [12] |
|                                                                 | 785/6                    |                             | $\sim 1000$          | $\sim 102$        |              |                    |      |
| MAPbI <sub>3</sub> /WS <sub>2</sub>                             | 505/0.5                  | $\sim 10^{-10}$             | $\sim 3 \times 10^5$ | 2.4               | 2.7/7.5 ms   | $10 \times 2000$   | [13] |
| MAPbBr <sub>3</sub> /EA/TiO <sub>2</sub>                        | White/0.5                | $1.51 \times 10^{-11}$      | 2700                 | 0.13              | 0.49/1.17 s  | $30 \times 2000$   | [14] |
| GQDs/MAPbI <sub>3</sub>                                         | 405/1.6                  | $4.5 \times 10^{-5}$        | -                    | 12                | 140/160 ms   | -                  | [15] |
| <b>This Work</b>                                                | White/0.1                | $\sim 1.55 \times 10^{-11}$ | $1.3 \times 10^4$    | 3.38              | 0.45/0.33 s  | $30 \times 2000$   | -    |

Note: Psk here represents the perovskite.

## References

- Lu, H.; Tian, W.; Cao, F.; Ma, Y.; Gu, B.; Li, L. A Self-Powered and Stable All-Perovskite Photodetector-Solar Cell Nanosystem. *Adv. Funct. Mater.* **2016**, *26*, 1296–1302, <https://doi.org/10.1002/adfm.201504477>.
- Shaikh, P.A.; Shi, D.; Retamal, J.R.D.; Sheikh, A.D.; Haque, A.; Kang, C.-F.; He, J.-H.; Bakr, O.M.; Wu, T. Schottky junctions on perovskite single crystals: light-modulated dielectric constant and self-biased photodetection. *J. Mater. Chem. C* **2016**, *4*, 8304–8312, <https://doi.org/10.1039/c6tc02828d>.
- Wang, Y.; Zhang, T.; Zhang, P.; Liu, D.; Ji, L.; Chen, H.; Chen, Z.D.; Wu, J.; Li, S. Solution processed PCBM-CH<sub>3</sub>NH<sub>3</sub>PbI<sub>3</sub> hetero-junction photodetectors with enhanced performance and stability. *Org. Electron.* **2018**, *57*, 263–268, <https://doi.org/10.1016/j.orgel.2018.02.043>.
- Chen, S.; Teng, C.; Zhang, M.; Li, Y.; Xie, D.; Shi, G. A Flexible UV-Vis-NIR Photodetector based on a Perovskite/Conjugated-Polymer Composite. *Adv. Mater.* **2016**, *28*, 5969–5974, <https://doi.org/10.1002/adma.201600468>.
- Ding, J.; Du, S.; Zhao, Y.; Zhang, X.; Zuo, Z.; Cui, H.; Zhan, X.; Gu, Y.; Sun, H. High-quality inorganic-organic perovskite CH<sub>3</sub>NH<sub>3</sub>PbI<sub>3</sub> single crystals for photo-detector applications. *J. Mater. Sci.* **2016**, *52*, 276–284, <https://doi.org/10.1007/s10853-016-0329-2>.
- Ramasamy, P.; Lim, D.-H.; Kim, B.; Lee, S.-H.; Lee, M.-S.; Lee, J.-S. All-inorganic cesium lead halide perovskite nanocrystals for photodetector applications. *Chem. Commun.* **2015**, *52*, 2067–2070, <https://doi.org/10.1039/c5cc08643d>.
- Lee, Y.; Kwon, J.; Hwang, E.; Ra, C.-H.; Yoo, W.J.; Ahn, J.-H.; Park, J.H.; Cho, J.H. High-Performance Perovskite-Graphene Hybrid Photodetector. *Adv. Mater.* **2014**, *27*, 41–46, <https://doi.org/10.1002/adma.201402271>.
- Sun, Z.; Aigouy, L.; Chen, Z. Plasmonic-enhanced perovskite-graphene hybrid photodetectors. *Nanoscale* **2016**, *8*, 7377–7383, <https://doi.org/10.1039/c5nr08677a>.
- Chen, Z.; Kang, Z.; Rao, C.; Cheng, Y.; Liu, N.; Zhang, Z.; Li, L.; Gao, Y. Improving Performance of Hybrid Graphene-Perovskite Photodetector by a Scratch Channel. *Adv. Electron. Mater.* **2019**, *5*, <https://doi.org/10.1002/aelm.201900168>.
- Wang, Y.; Zhang, Y.; Lu, Y.; Xu, W.; Mu, H.; Chen, C.; Qiao, H.; Song, J.; Li, S.; Sun, B.; et al. Hybrid Graphene-Perovskite Phototransistors with Ultrahigh Responsivity and Gain. *Adv. Opt. Mater.* **2015**, *3*, 1389–1396, <https://doi.org/10.1002/adom.201500150>.
- Spina, M.; Lehmann, M.; Náfrádi, B.; Bernard, L.; Bonvin, E.; Gaál, R.; Magrez, A.; Forró, L.; Horváth, E. Microengineered CH<sub>3</sub>NH<sub>3</sub>PbI<sub>3</sub>Nanowire/Graphene Phototransistor for Low-Intensity Light Detection at Room Temperature. *Small* **2015**, *11*, 4824–4828, <https://doi.org/10.1002/smll.201501257>.
- Kang, D.-H.; Pae, S.R.; Shim, J.; Yoo, G.; Jeon, J.; Leem, J.W.; Yu, J.S.; Lee, S.; Shin, B.; Park, J.-H. An Ultrahigh-Performance Photodetector based on a Perovskite-Transition-Metal-Dichalcogenide Hybrid Structure. *Adv. Mater.* **2016**, *28*, 7799–7806, <https://doi.org/10.1002/adma.201600992>.
- Ma, C.; Shi, Y.; Hu, W.; Chiu, M.; Liu, Z.; Bera, A.; Li, F.; Wang, H.; Li, L.; Wu, T. Heterostructured WS<sub>2</sub>/CH<sub>3</sub>NH<sub>3</sub>PbI<sub>3</sub> Photoconductors with Suppressed Dark Current and Enhanced Photodetectivity. *Adv. Mater.* **2016**, *28*, 3683–3689, <https://doi.org/10.1002/adma.201600069>.
- Khan, A.; Yu, Z.; Khan, U.; Dong, L. Solution Processed Trilayer Structure for High-Performance Perovskite Photodetector. *Nanoscale Res. Lett.* **2018**, *13*, 399, <https://doi.org/10.1186/s11671-018-2808-7>.
- Subramanian, A.; Akram, J.; Hussain, S.; Chen, J.; Qasim, K.; Zhang, W.; Lei, W. High-Performance Photodetector Based on a Graphene Quantum Dot/CH<sub>3</sub>NH<sub>3</sub>PbI<sub>3</sub> Perovskite Hybrid. *ACS Appl. Electron. Mater.* **2019**, *2*, 230–237, <https://doi.org/10.1021/acsaem.9b00705>.
